# Supplementary material for: Polymeric nanoformulations aimed at cancer metabolism reprogramming with high specificity to inhibit tumor growth
Source: Royal Society of Chemistry journal article supplement (doi:10.1039/d4bm00887a), 2024-01-01
Supplement: d4bm00887a1.pdf [file d4bm00887a1.pdf]

Supplementary materials

**Polymeric Nanoformulations Aimed at Cancer Metabolism  
Reprogramming with High Specificity to Inhibit Tumor Growth**

Yu Xia, Ming-kang Zhang, Jing-jie Ye, Mei-ting Niu, Zi-yang Wang, Xin-yi Dai, Zhi-ling He, Jun Feng\*

Key Laboratory of Biomedical Polymers of Ministry of Education&Department of Chemistry, Wuhan University, Wuhan 430072, P.R. China.

\*To whom correspondence should be addressed. E-mail address: [fengjun@whu.edu.cn](mailto:fengjun@whu.edu.cn)

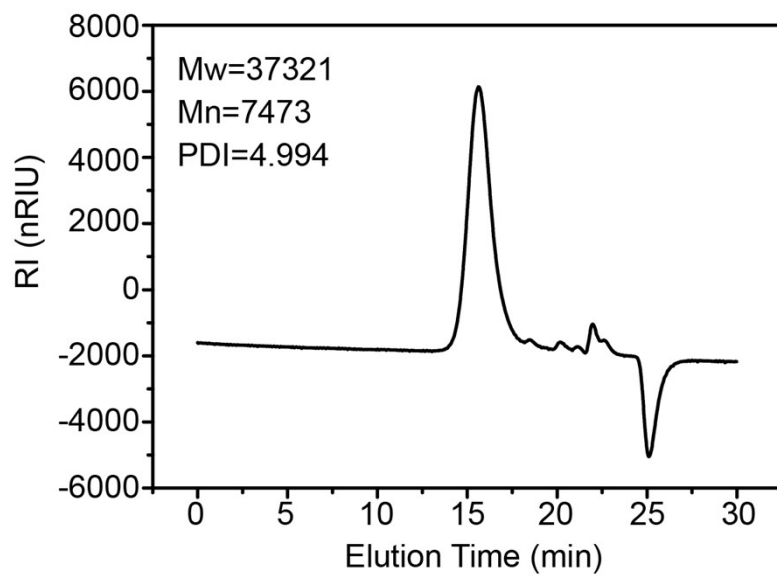

**Fig. S1** Gel Permeation Chromatography (GPC) of PLGA.

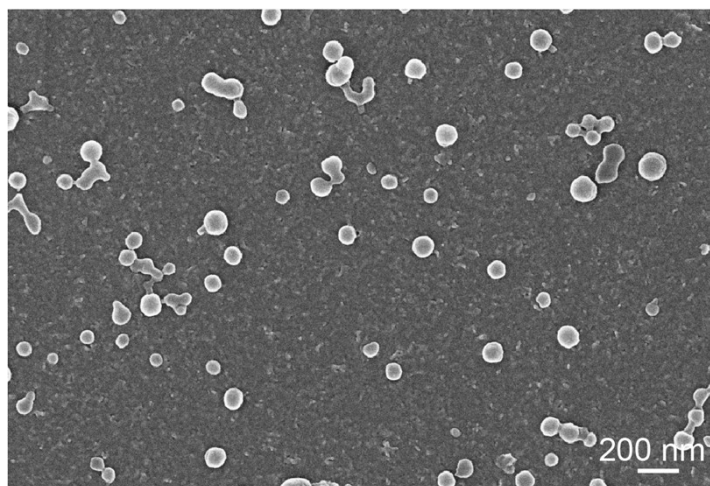

**Fig. S2** SEM image of GBP.

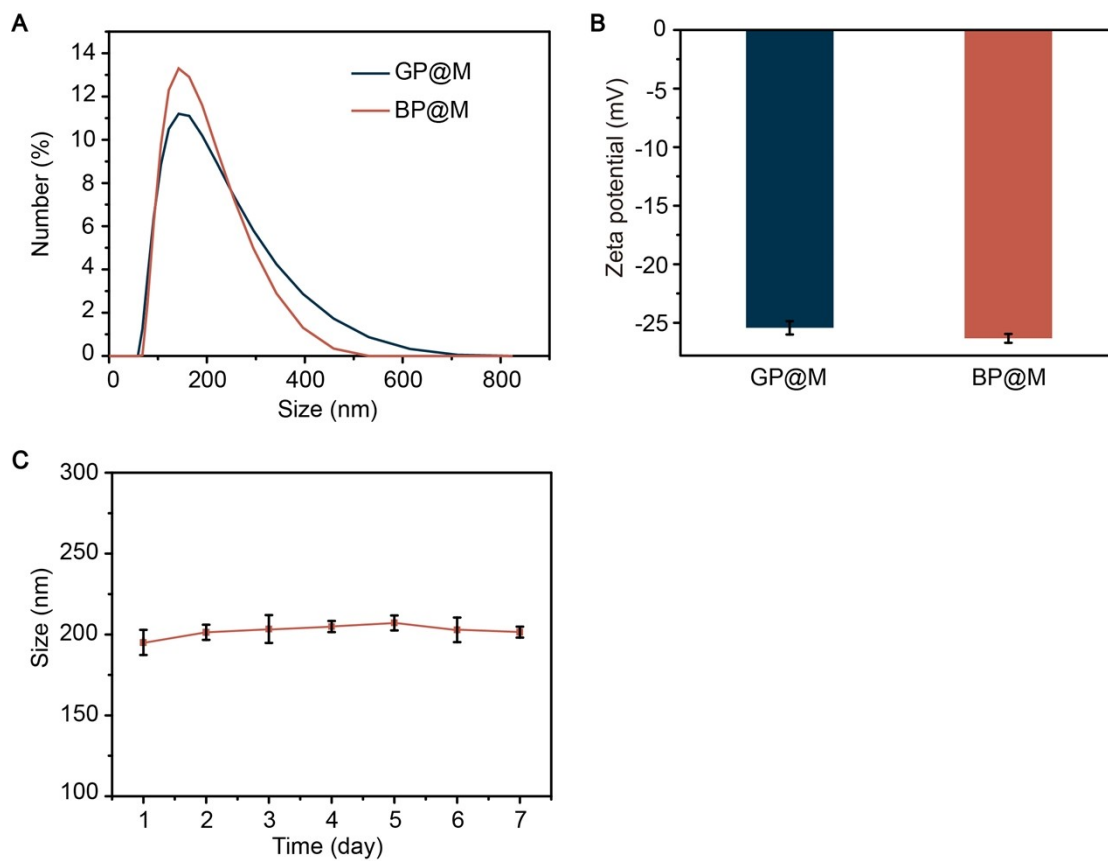

**Fig. S3** (A) Hydrodynamic diameter of GP@M and BP@M. (B) Zeta potential of GP@M and BP@M. (C) 7-day serum stability of GBP@M.

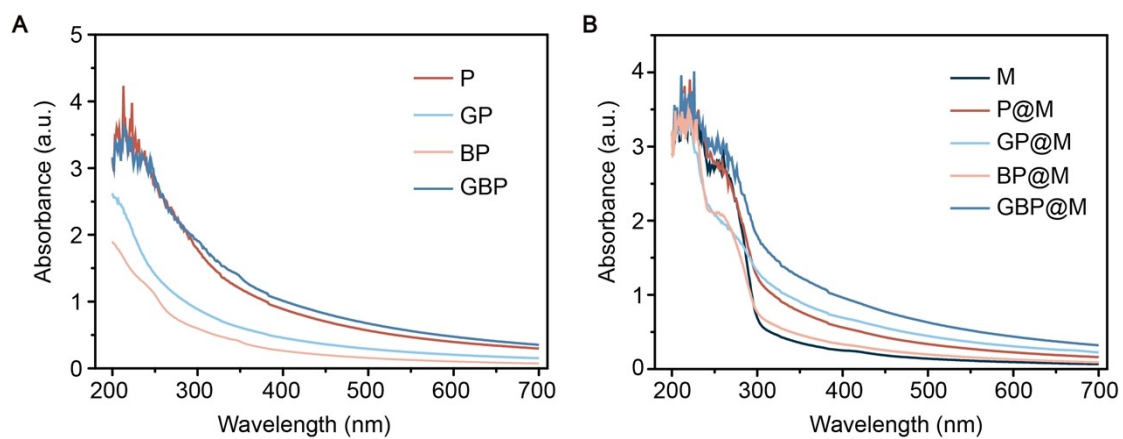

**Fig. S4** (A) UV absorption of P, GP, BP, GBP. (B) UV absorption of M, P@M, GP@M, BP@M, GBP@M.

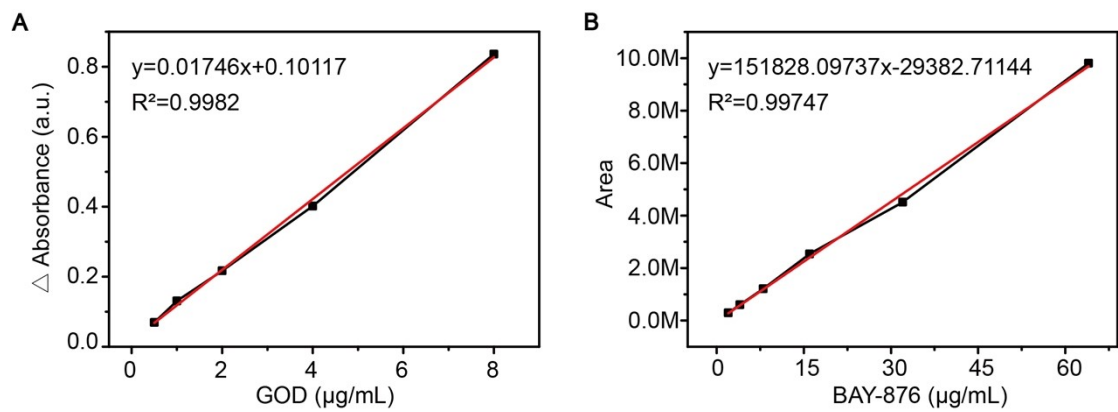

**Fig. S5** Standard curves of (A) GOD and (B) BAY-876 determined by GOD activity testing kit and HPLC, respectively.

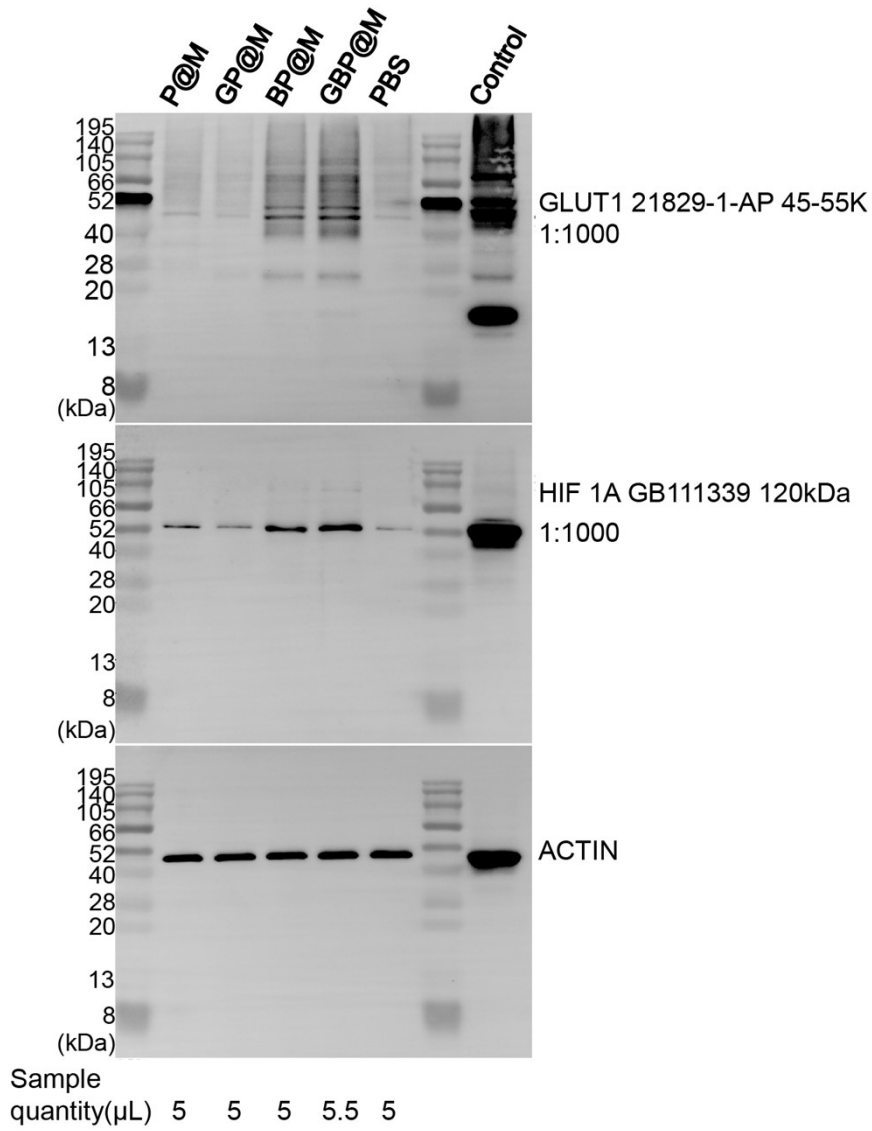

**Fig. S6** Raw data of Western blotting analyses for GLUT1 and HIF-1 $\alpha$  in 4T1 cells after various treatments.

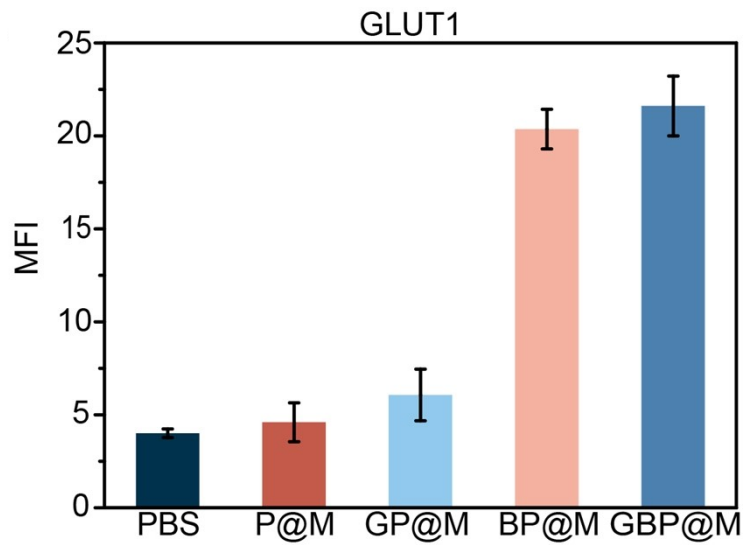

**Fig. S7** Mean fluorescence intensity of immunofluorescence staining of GLUT1 on 4T1 cells membranes after different treatments (50  $\mu\text{g}/\text{mL}$ ) for 24 hours. The data were obtained according to Fig. 1K.



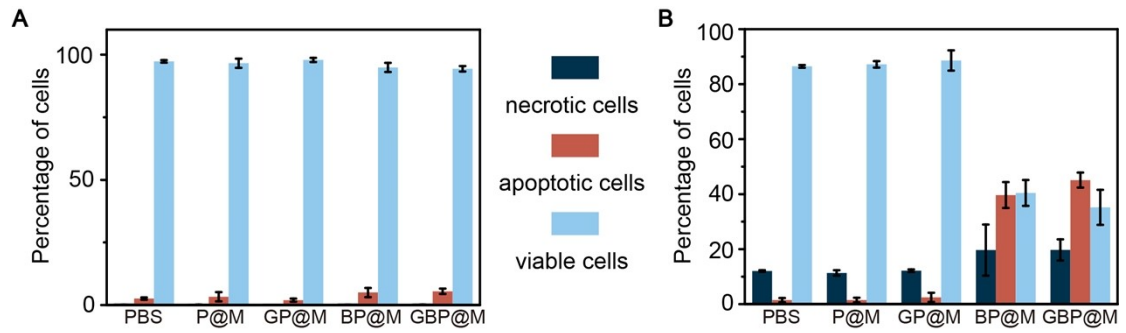

**Fig. S8** Quantitative analysis of apoptosis and necrosis of 3T3 (A) and 4T1 (B) cells after 24 hours treatments with different samples (80  $\mu\text{g}/\text{mL}$ ). The data were obtained according to Fig. 2D.

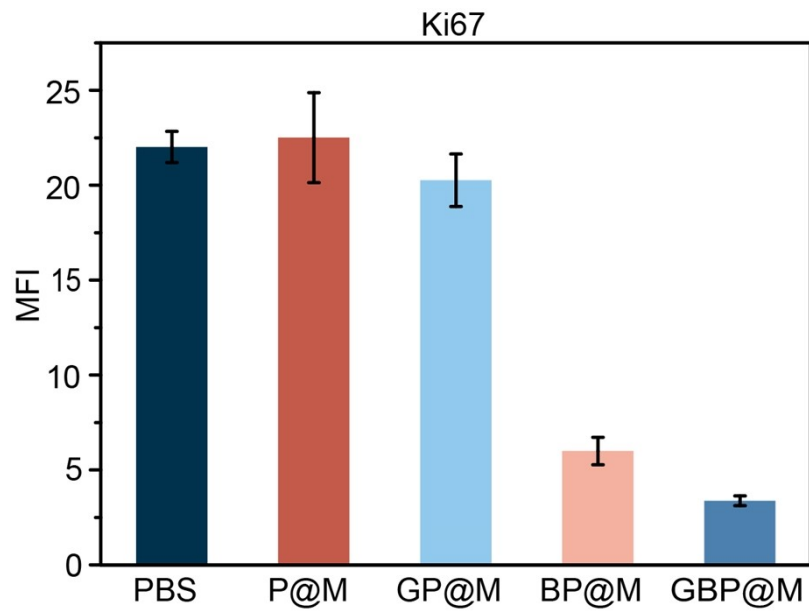

**Fig. S9** Mean fluorescence intensity of immunofluorescence staining of Ki67 on 4T1 cells membranes after different treatments (50  $\mu\text{g}/\text{mL}$ ) for 24 hours. The data were obtained according to Fig. 2E.

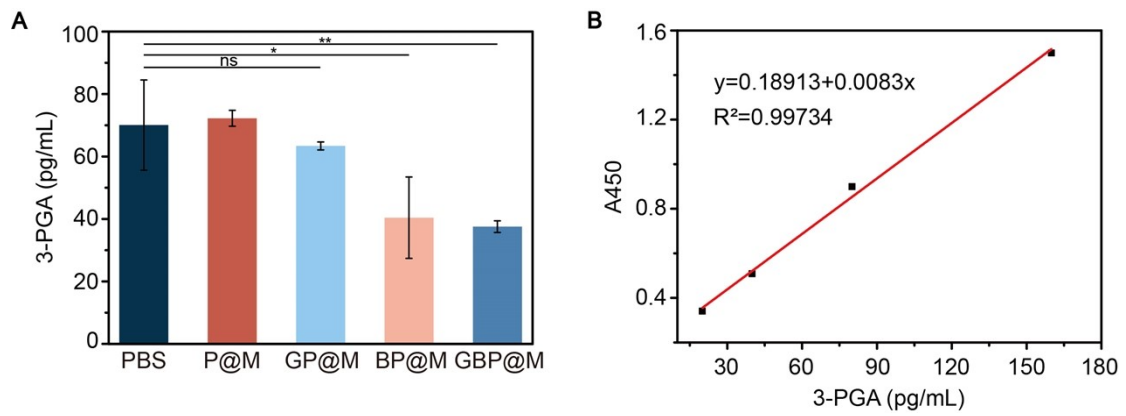

**Fig. S10** (A) Contents of 3-PGA in 4T1 cells after different treatments (n=3). (B) Standard curve of absorbance of 3-PGA. Significant differences were determined using one-way ANOVA. \*P <0.05; \*\*P <0.01; ns indicates no significance. Data are presented as means ± standard deviation.

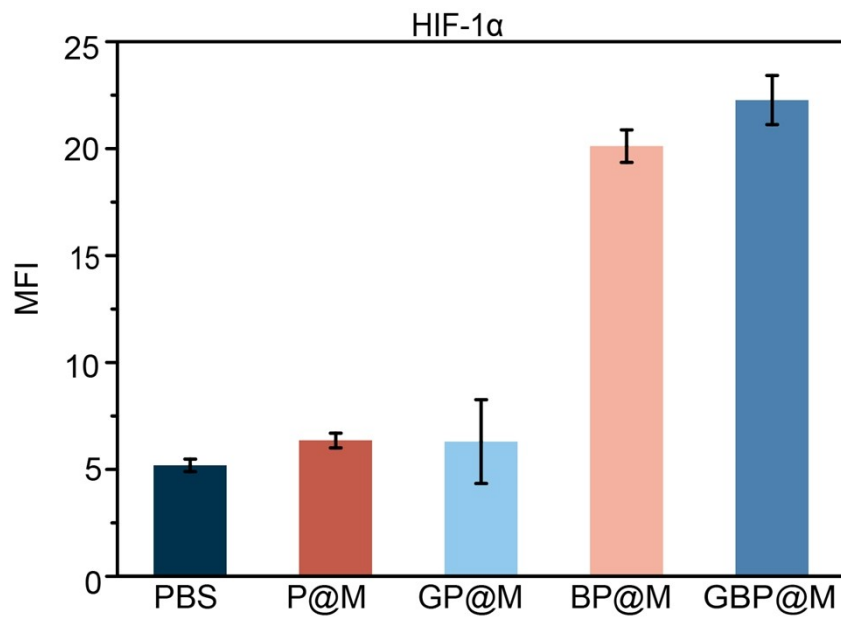

**Fig. S11** Mean fluorescence intensity of immunofluorescence staining of HIF-1 $\alpha$  on 4T1 cells after different treatments (50  $\mu\text{g}/\text{mL}$ ) for 24 hours. The data were obtained according to Fig. 2F.

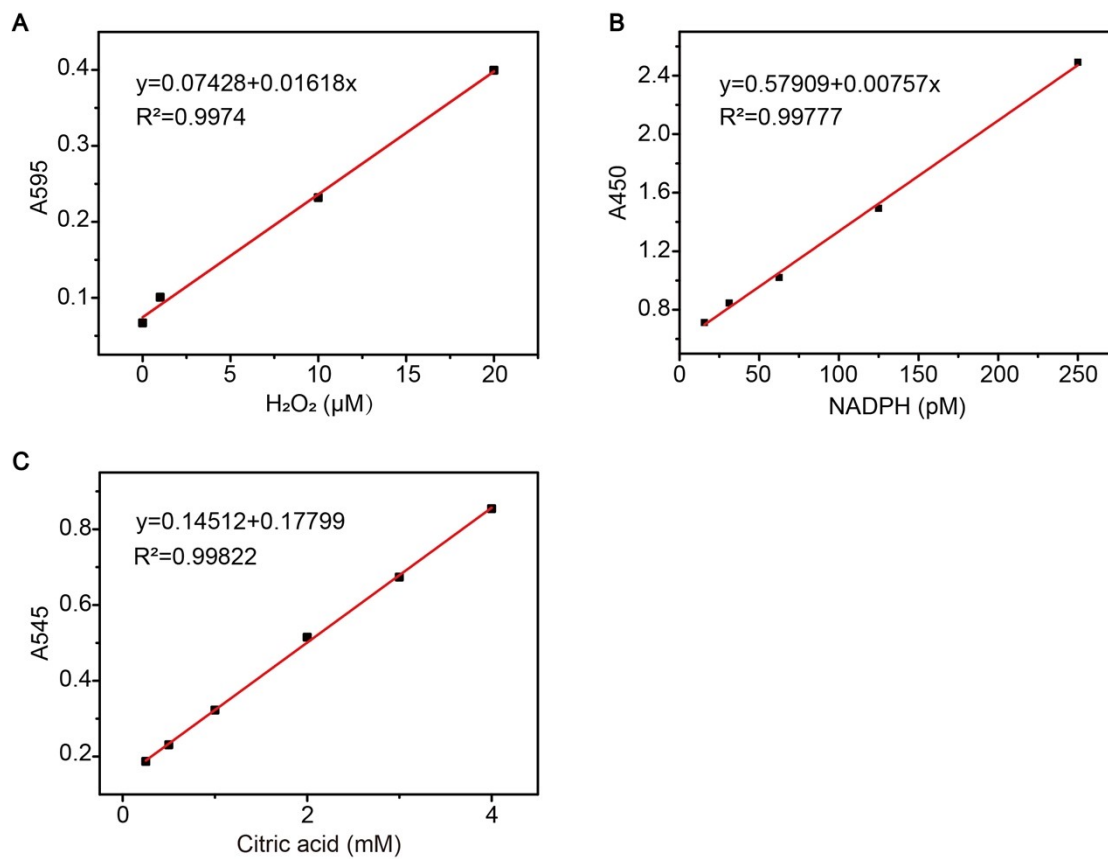

**Fig. S12** Standard curves of absorbance of (A)  $H_2O_2$ , (B) NADPH, (C) citric acid.

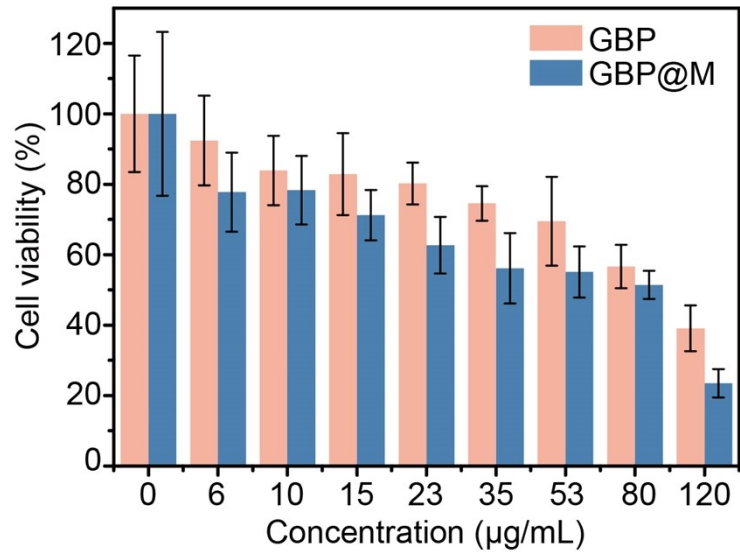

**Fig. S13** Cytotoxicity data of GBP and GBP@M in 4T1 cells.

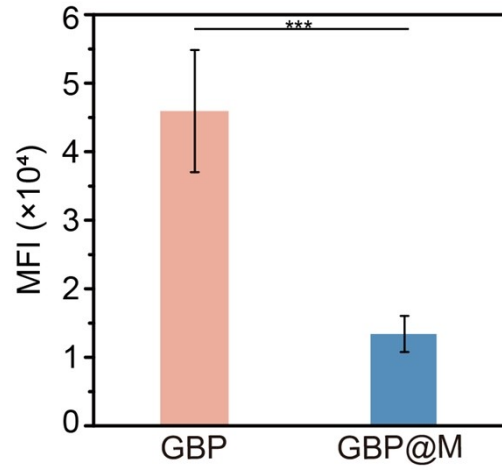

**Fig. S14** Mean fluorescence intensity of DIR-labeled GBP and GBP@M in RAW 264.7 macrophages (n=3). Significant differences were determined using Independent Samples t-test. \*\*\*P < 0.001. Data are presented as means  $\pm$  standard deviation.

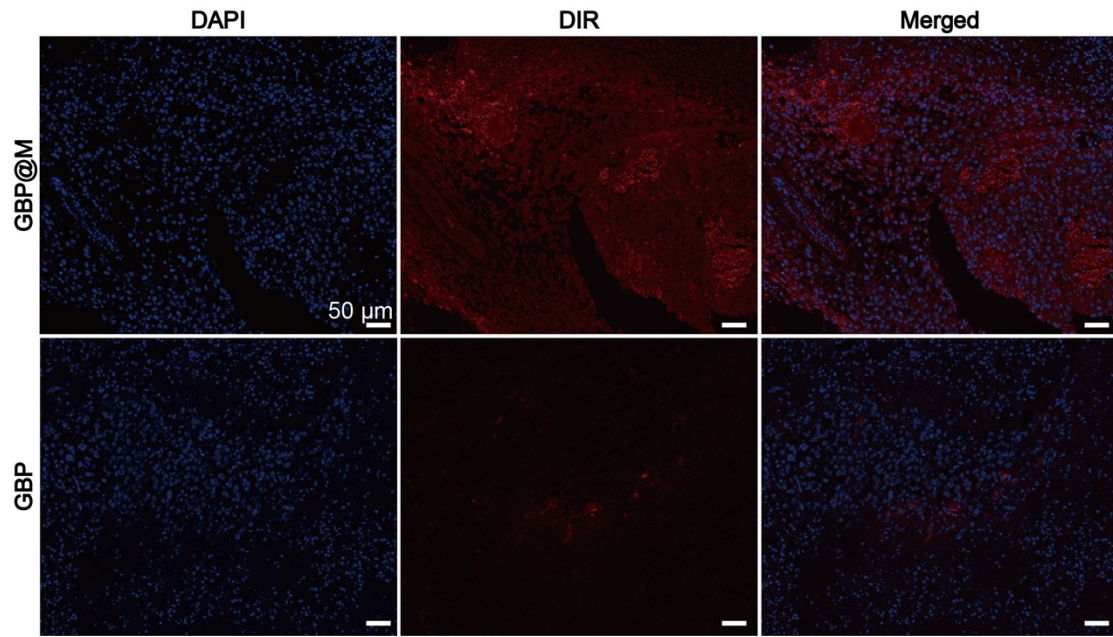

**Fig. S15** Fluorescence images of tumor slices obtained from 4T1 tumor-bearing mice after intravenous injection of DIR-labeled GBP and GBP@M (10 mg/kg).



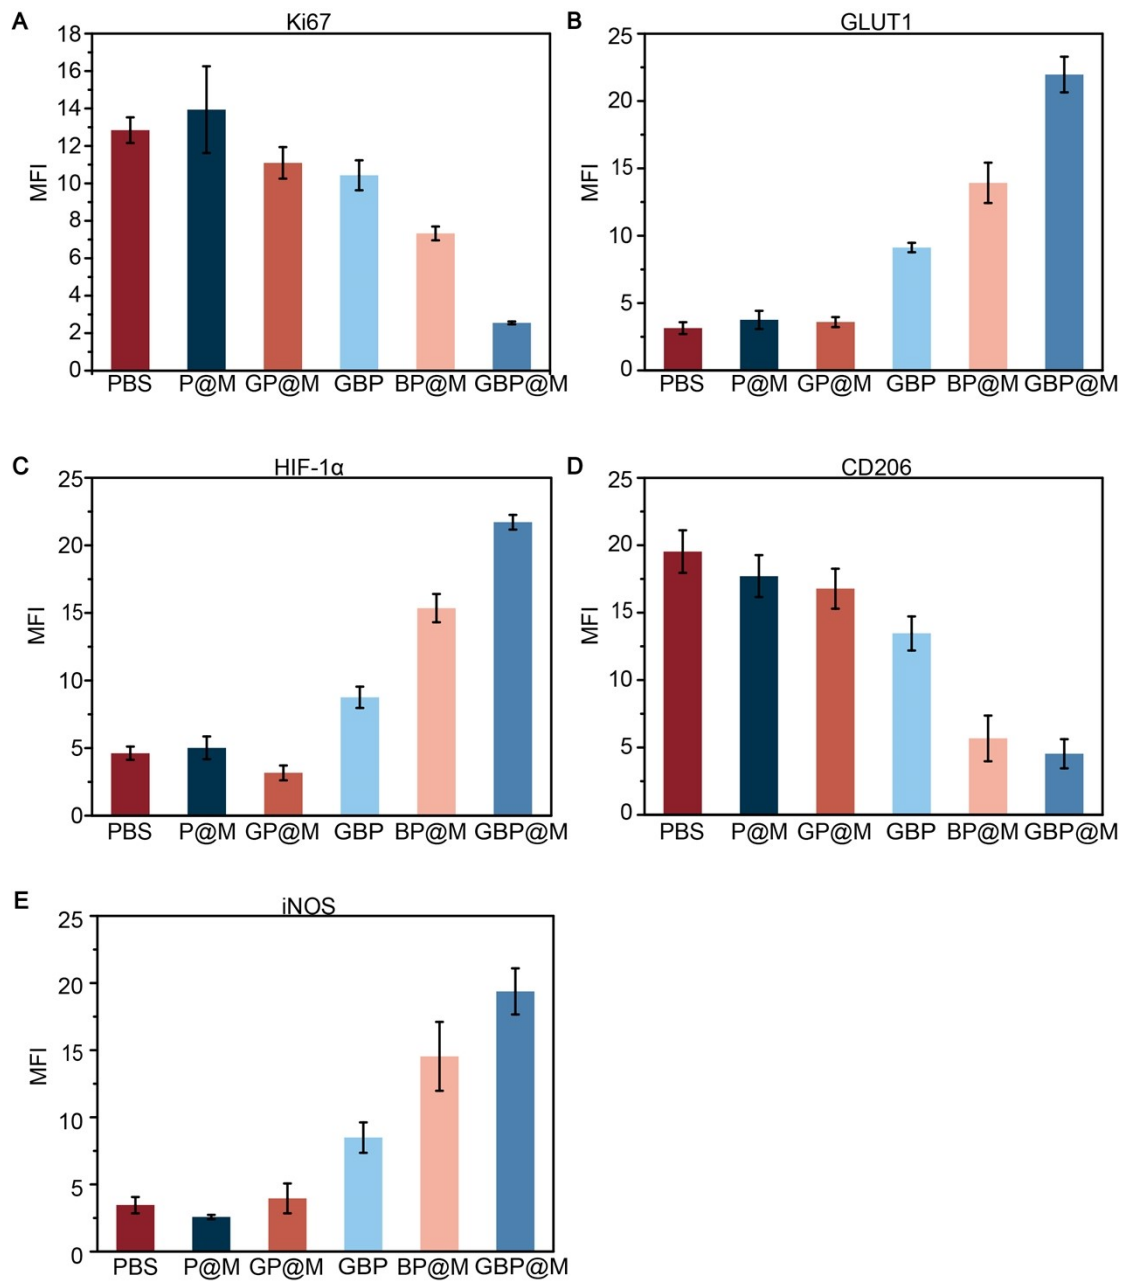

**Fig. S16** Mean fluorescence intensity of immunofluorescence staining of Ki67 (A), GLUT1 (B), HIF-1 $\alpha$  (C), CD206 (D) and iNOS (E) toward tumor histologic sections after different treatments. The data were obtained according to Fig. 4D-K.

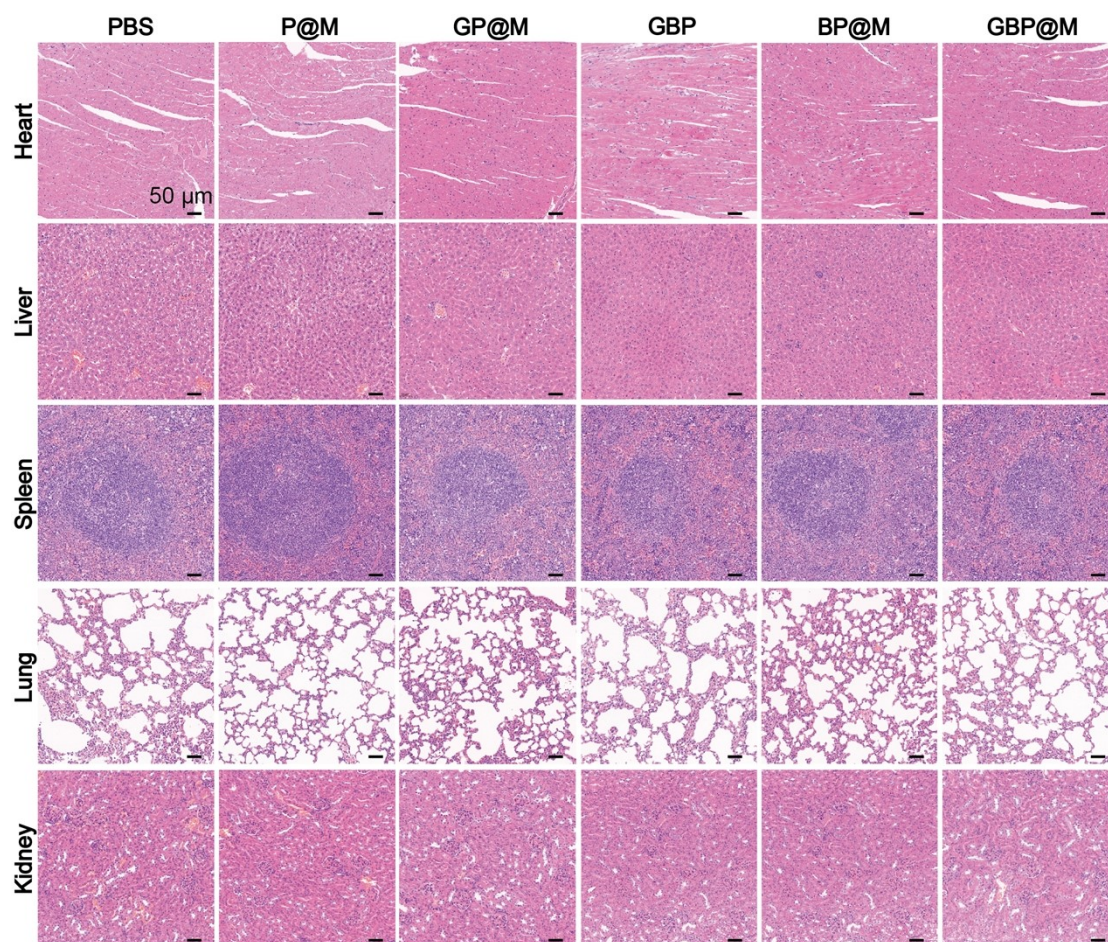

**Fig. S17** H&E staining of major organs slices after different treatments.

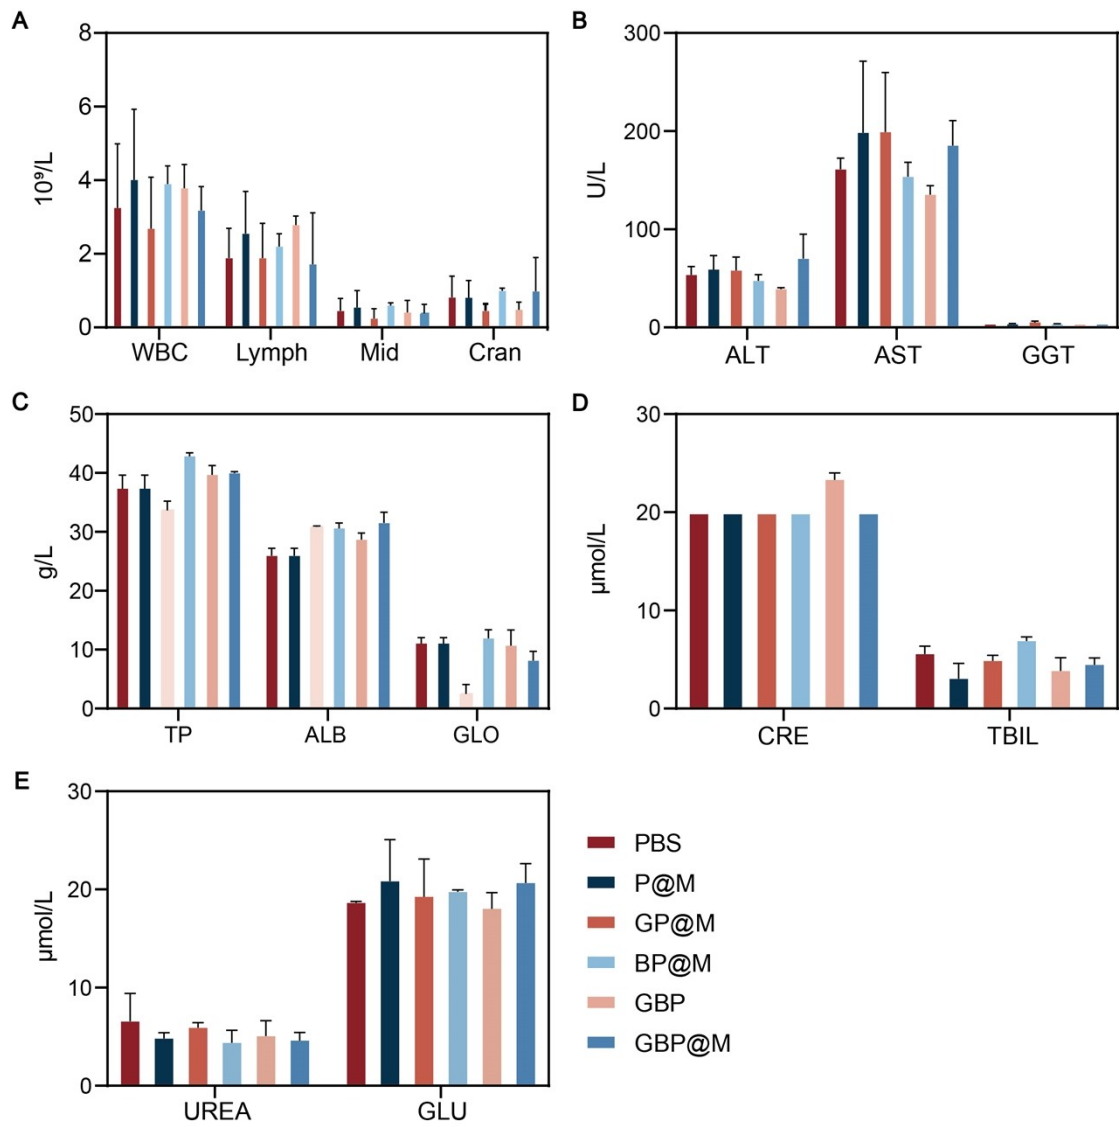

**Fig. S18** Blood routine analysis (A) and blood biochemistry data (B-E) of mice measured on Day 14 after receiving various treatments.
